# Supplementary material
Source: Springer Nature journal article supplement (https://www.springermedizin.de/resource/supplementary/12971_2011_116_MOESM1_ESM.pdf/9595418)

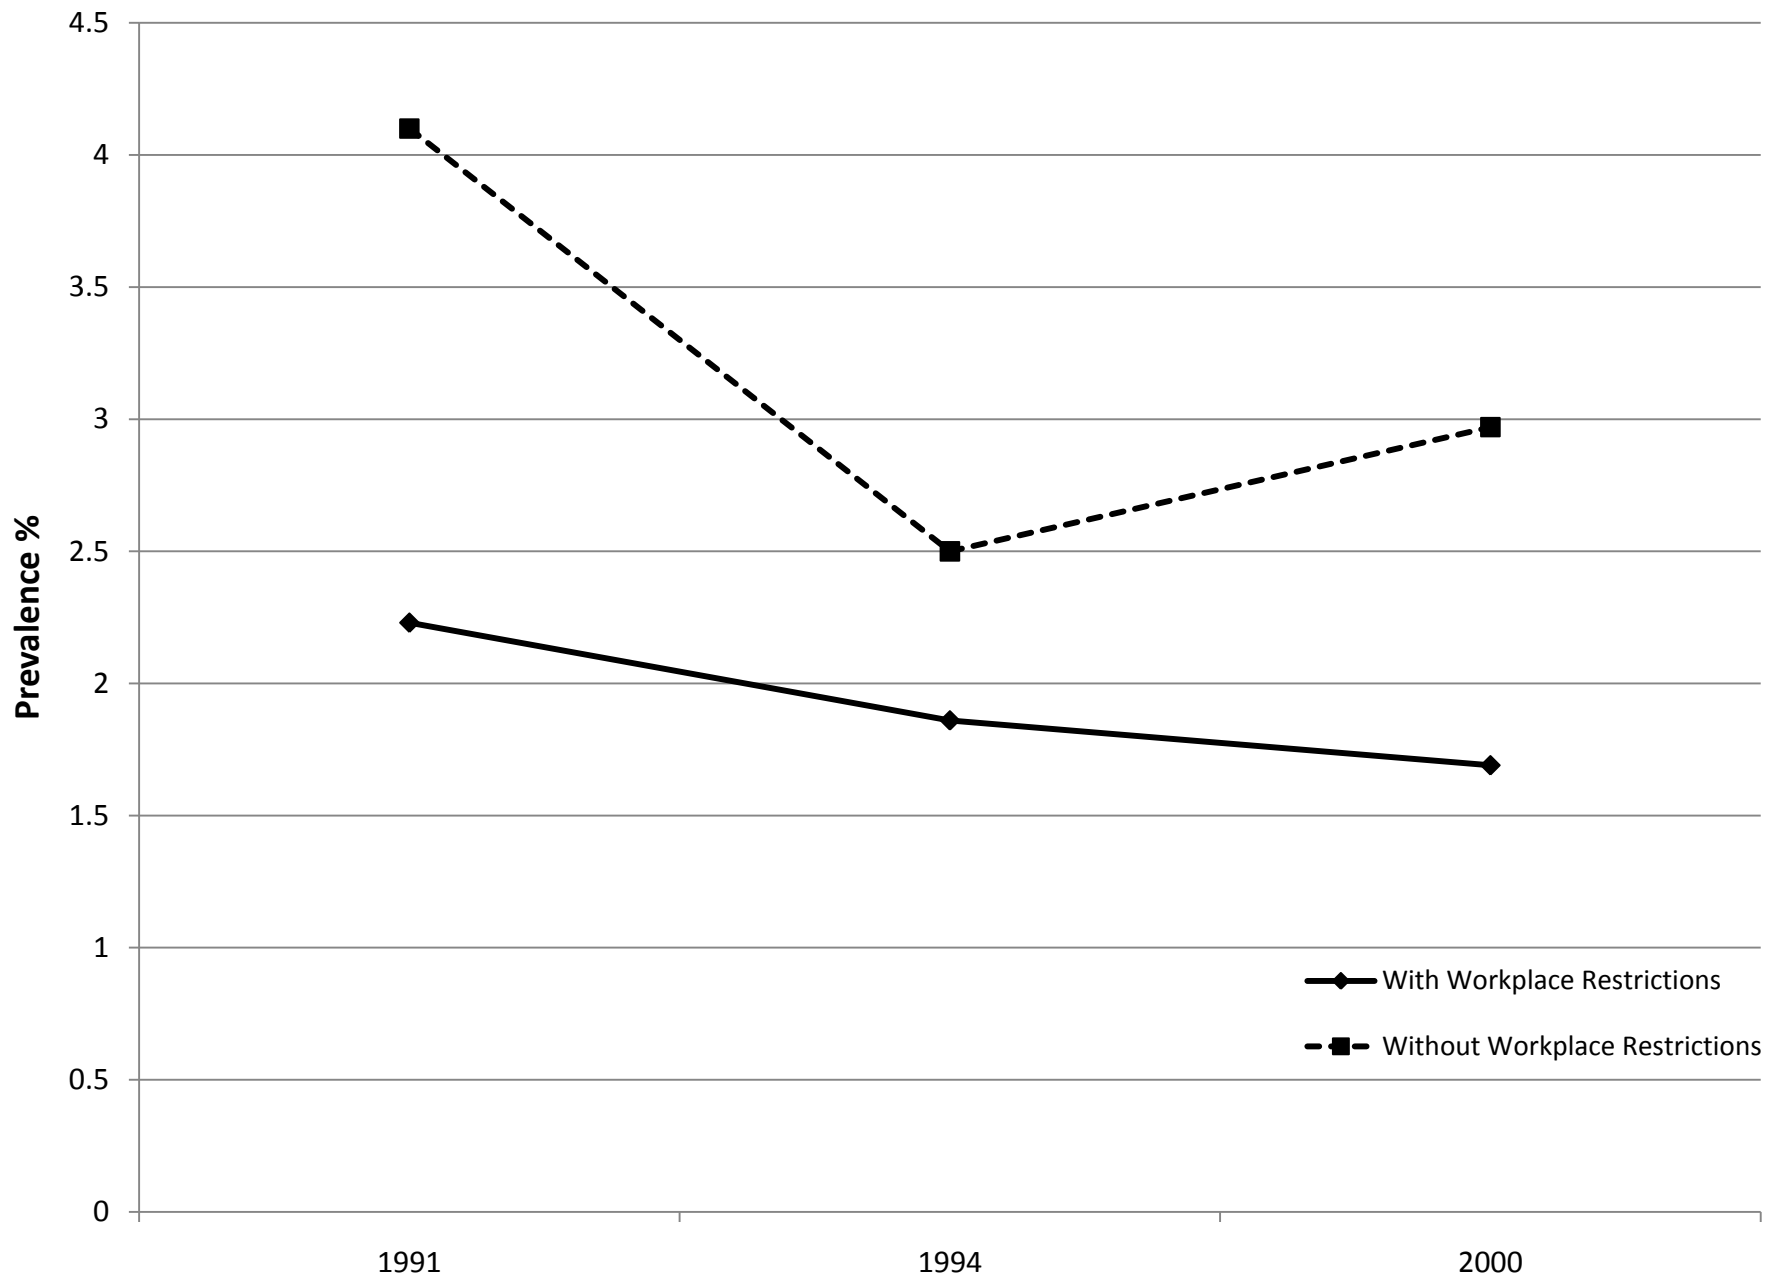

Supplement: MOESM1 [file 9595418]
